# Supplementary material for: Ingestible sensor system for measuring, monitoring and enhancing adherence to antiretroviral therapy: An open-label, usual care-controlled, randomised trial
Source: PubMed Central journal article supplement — eBioMedicine. 2022 Nov 10;86:104330. doi: 10.1016/j.ebiom.2022.104330 (PMC9782816; doi:10.1016/j.ebiom.2022.104330), 2022-11-10
Supplement: mmc5.pdf [file mmc5.pdf]

The sensor contains tiny amounts of silicon, copper and magnesium that pass through the body naturally, just like the fiber in food.

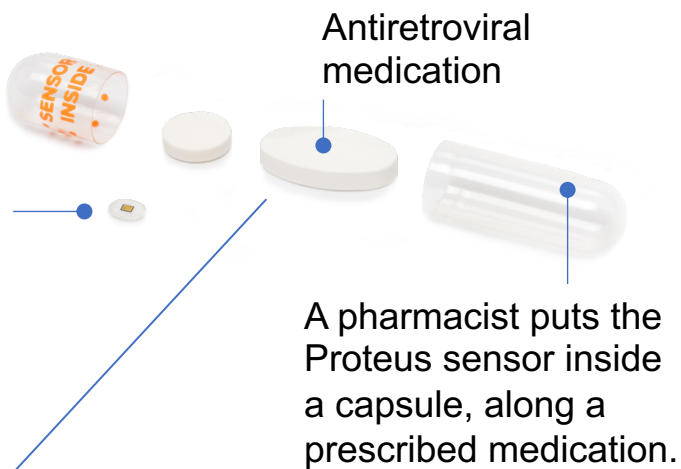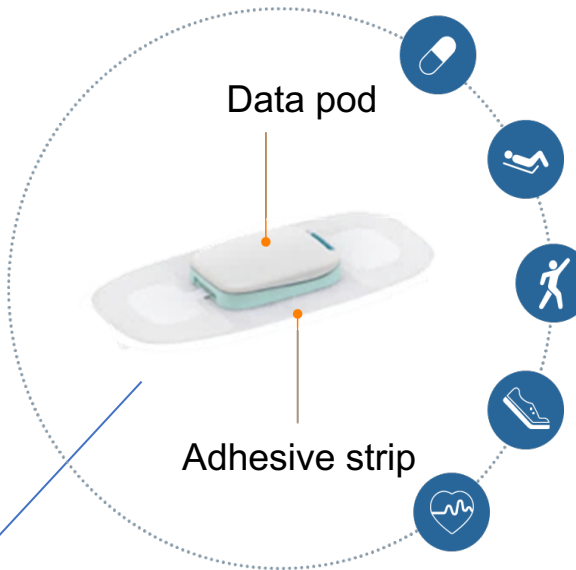

Records DigiMeds™ and the time they were taken

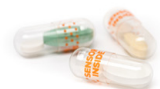

DigiMeds™

The sensor sends a signal to the patch as it passes through the stomach.

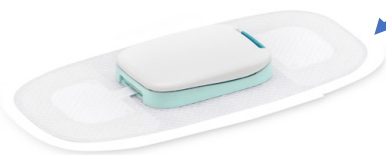

Wearable patch

The patch sends this information to the app along with records of activity and rest.

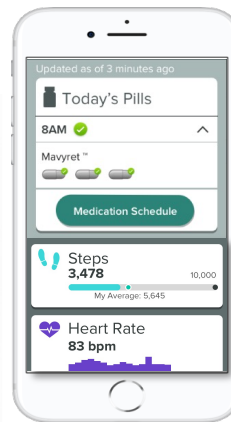

Discover app

The mobile device acts as a conduit between data pod and server.

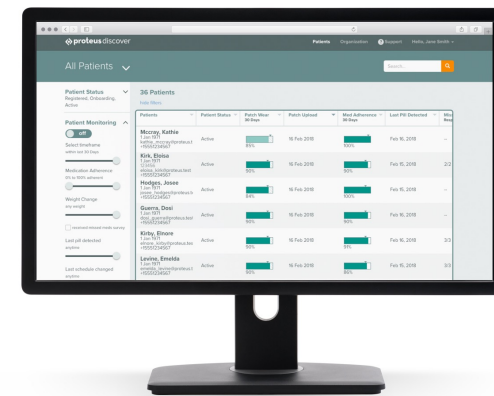

Behind the scenes – patient management
