# Supplementary material for: Ingestible sensor system for measuring, monitoring and enhancing adherence to antiretroviral therapy: An open-label, usual care-controlled, randomised trial
Source: PubMed Central journal article supplement — eBioMedicine. 2022 Nov 10;86:104330. doi: 10.1016/j.ebiom.2022.104330 (PMC9782816; doi:10.1016/j.ebiom.2022.104330), 2022-11-10
Supplement: mmc6.pdf [file mmc6.pdf]

IS Adherence (%)

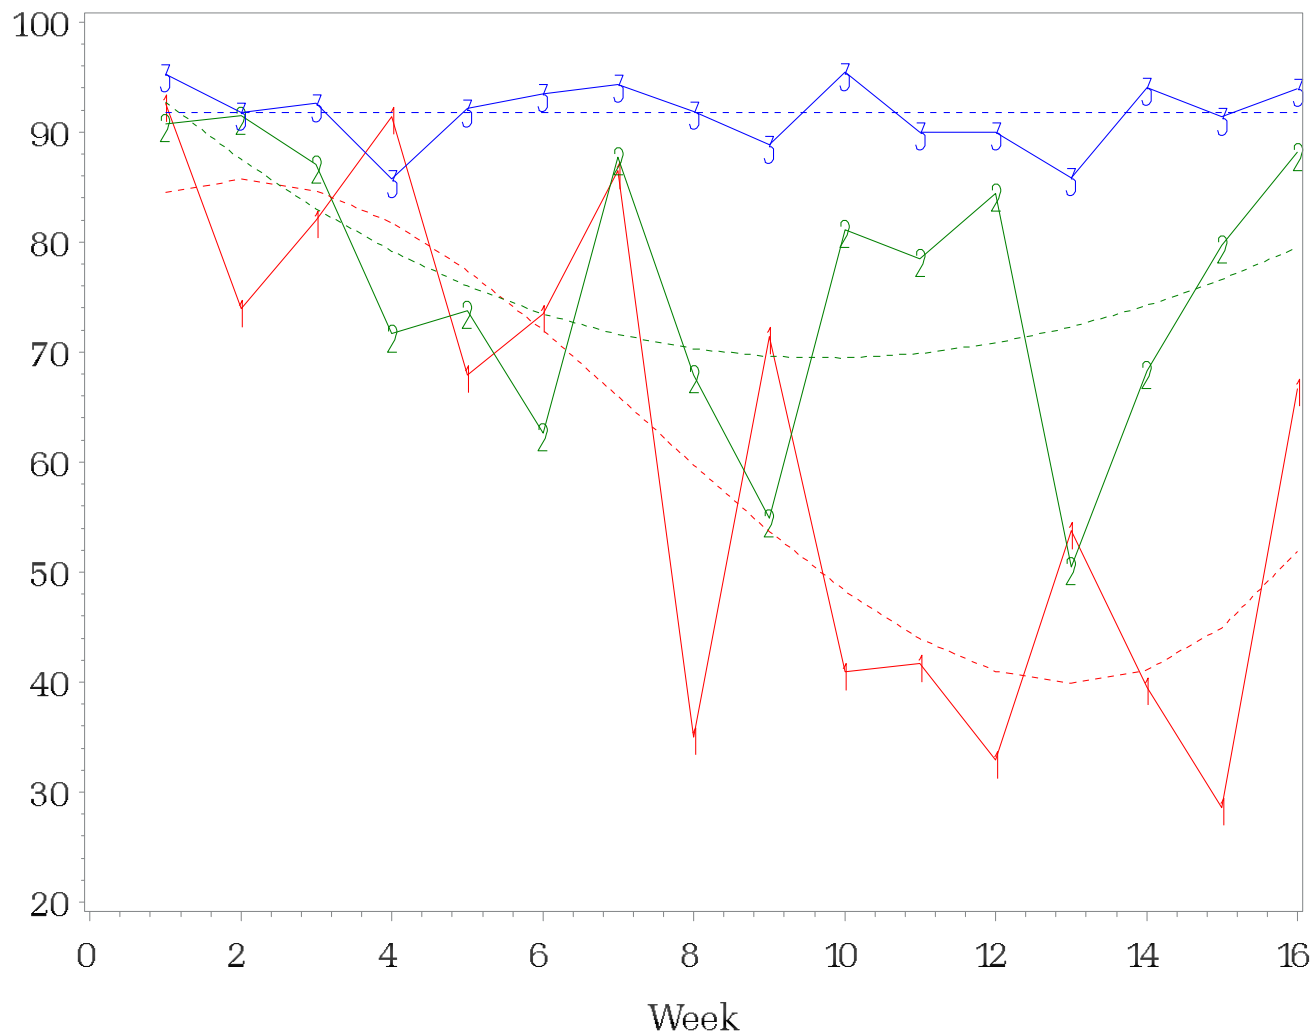

| Groups         | N  | IPAM score (ARV concentration) - mean (SD) | VL decline from baseline - mean (SD) | VL suppression at week 16 - n (%) | VL suppression at week 28 - n (%) |
|----------------|----|--------------------------------------------|--------------------------------------|-----------------------------------|-----------------------------------|
| 1              | 6  | 0.57 (0.40)                                | 0.14 (0.26)                          | 3/5 (60.0%)                       | 3/5 (60.0%)                       |
| 2              | 7  | 0.88 (0.13)                                | 0.29 (0.61)                          | 5/5 (100%)                        | 2/4 (50.0%)                       |
| 3              | 40 | 0.84 (0.27)                                | 0.35 (0.83)                          | 32/34 (94.1%)                     | 30/32 (93.8%)                     |
| <b>P-value</b> |    | 0.09                                       | 0.83                                 | 0.11                              | 0.02                              |
